P3696

### Correlates of the ratio of acceleration time to ejection time in patients with aortic stenosis: an echocardiographic and computed tomography study

A. Altes<sup>1</sup>, M. Sochala<sup>2</sup>, D. Attias<sup>2</sup>, J. Dreyfus<sup>2</sup>, M. Toledano<sup>1</sup>, L. Macron<sup>2</sup>, C. Renard<sup>3</sup>, A. Truffier<sup>1</sup>, R.A. Guerbaai<sup>4</sup>, P.V. Ennezat<sup>5</sup>, P. Graux<sup>1</sup>, C. Tribouilloy<sup>3</sup>, S. Marechaux<sup>1</sup>

<sup>1</sup>Lille Catholic University, Lille, France; <sup>2</sup>Centre Cardiologique du Nord (CCN), Saint Denis, France; <sup>3</sup>UPJV Amiens, Amiens, France; <sup>4</sup>University of Basel, Basel, Switzerland; <sup>5</sup>University Hospital of Grenoble, Grenoble, France

**Funding Acknowledgement:** Local funding

**Background:** Acceleration time to ejection time ratio (AT/ET) prolongation is associated with increased mortality in patients with aortic stenosis (AS).

**Purpose:** To identify the determinants associated with increased AT/ET.

**Methods:** The relationships between AT/ET ratio, clinical and Doppler echocardiographic variables of interest in the setting of AS were studied in 1107 patients with AS and preserved left ventricular (LV) ejection fraction (EF), with Computed Tomography – Aortic Valve Calcium (CT-AVC) score studied in a subgroup of 342 patients.

**Results:** In univariate analysis, AT/ET ratio did correlate with aortic peak velocity ( $V_{max}$ ,  $r=0.57$ ,  $p<0.0001$ ), mean pressure gradient (MPG,  $r=0.60$ ,  $p<0.0001$ ), aortic valve area (AVA,  $r=-0.50$ ,  $p<0.0001$ ) and CT-AVC score ( $r=0.24$ ,  $p<0.0001$ ). An AT/ET ratio had a good accuracy to predict an aortic peak velocity  $\geq 4$  m/s, a  $MPG \geq 40$  mmHg, or an  $AVA \leq 1.0$  cm<sup>2</sup>, with

an optimal cut-off value of 0.34. By multivariate linear regression analysis, presence of AS-related symptoms, decreased LV stroke volume index, LVEF, systolic blood pressure (SBP), absence of diabetes mellitus, and increased LV mass index, relative wall thickness, and  $V_{max}$  were independently associated with increased AT/ET ratio (all  $P<0.05$ ). In the subgroup of patients who underwent CT-AVC, CT-AVC score was independently associated with increased AT/ET ratio ( $P<0.05$ ).

**Conclusion:** AT/ET ratio is related to echocardiographic and CT-AVC indices of AS severity. However, multiple intricate factors beyond hemodynamic and anatomic severity of AS influence AT/ET ratio including LV geometry, function and SBP. These findings should be considered when assessing AT/ET in patients with AS and preserved LVEF.

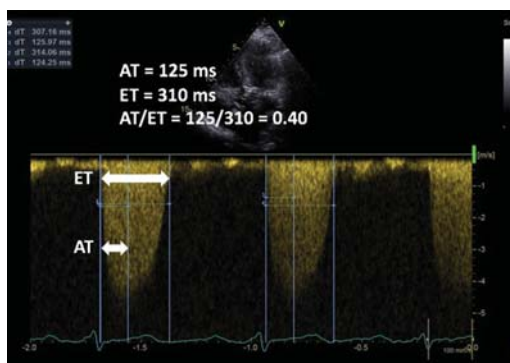

Source: http://academic.oup.com/eurheartj/article-pdf/40/Supplement_1/ehz745.0550/30202084/ehz745.0550.pdf
